1 Gene regulation of the avian malaria parasite *Plasmodium*  
2 *relictum*, during the different stages within the mosquito vector

3

4 Sekar, V.<sup>1,7\*</sup>, Rivero, A.<sup>2</sup>, Pigeault, R.<sup>2,4</sup>, Gandon S.<sup>3</sup>, Drews A.<sup>5</sup>, Dag Ahren<sup>6</sup> and Hellgren O.<sup>5\*</sup>

5 <sup>1</sup> Department of Biology, Lund University, Sweden

6 <sup>2</sup> MIVEGEC (CNRS – Université de Montpellier – IRD), Montpellier, France

7 <sup>3</sup> CEFE (CNRS - Université de Montpellier - Université Paul-Valéry – EPHE), Montpellier, France

8 <sup>4</sup> Department of Ecology and Evolution, CH-1015 Lausanne, Switzerland

9 <sup>5</sup> MEMEG, Department of Biology, Lund University, Sweden

10 <sup>6</sup> National Bioinformatics Infrastructure Sweden (NBIS), SciLifeLab, Department of Biology, Lund, Sweden.

11 <sup>7</sup>Present address: Science for Life Laboratory, Department of Molecular Biosciences, The Wenner-Gren  
12 Institute, Stockholm University, Sweden

13

14 \*Corresponding authors

15 Sekar, V. Science for Life Laboratory, Tomtebodavägen 23a, 171 65 Solna; vaishnovi.sekar@scilifelab.se

16 Hellgren O. MEMEG, Department of Biology, Sölvegatan 37, 22362 Lund, Sweden;

17 olof.hellgren@biol.lu.se

18 **Abstract**

19 The malaria parasite *Plasmodium relictum* is one of the most widespread species of avian malaria. As is the  
20 case in its human counterparts, bird *Plasmodium* undergoes a complex life cycle infecting two hosts: the  
21 arthropod vector and the vertebrate host. In this study, we examine the transcriptome of *P. relictum* (SGS1)  
22 during crucial timepoints within its natural vector, *Culex pipiens quinquefasciatus*. Differential gene-  
23 expression analyses identified genes linked to the parasites life-stages at: i) a few minutes after the blood meal  
24 is ingested, ii) during peak oocyst production phase, iii) during peak sporozoite phase and iv) during the late-  
25 stages of the infection. A large amount of genes coding for functions linked to host-immune invasion and  
26 multifunctional genes was active throughout the infection cycle. One gene associated with a conserved  
27 *Plasmodium* membrane protein with unknown function was upregulated throughout the parasite development  
28 in the vector, suggesting an important role in the successful completion of the sporogonic cycle. Transcript  
29 annotation further revealed novel genes, which were significantly differentially expressed during the infection  
30 in the vector as well as upregulation of reticulocyte-binding proteins, which raises the possibility of the  
31 multifunctionality of these RBPs. We establish the existence of highly stage-specific pathways being  
32 overexpressed during the infection. This first study of gene-expression of a non-human *Plasmodium* species  
33 in its natural vector provides a comprehensive insight into the molecular mechanisms of the common avian  
34 malaria parasite *P. relictum* and provides essential information on the evolutionary diversity in gene regulation  
35 of the *Plasmodium*'s vector stages.

36 **Keywords:** Transmission, *Plasmodium relictum*, *Culex pipiens quinquefasciatus*, *extrinsic incubation*

37

38

39

40

41

42

43

44

45

46

47

48

49

50

51

## 52 **Introduction**

53 *Plasmodium* parasites are best known due to the dramatic mortality and morbidity they cause in humans across  
54 the Southern hemisphere. This group of parasites can also be found infecting a diverse range of other hosts  
55 including non-human primates, bats, rodent, reptiles, and birds (Ott 1967; Levine 1988). But for a few minor  
56 differences (Schall 1996), all these species share a nearly identical life cycle, with an asexual replicative stage  
57 in the vertebrate host, and an sexual stage a blood-sucking culicid mosquito (Diptera: Culicidae). The avian  
58 *Plasmodium* clade includes some of the world's most genetically diverse (Bensch, et al. 2009) and virulent  
59 (Warner 1968) of all malaria parasites known to date (Valkiūnas 2005; Chagas, et al. 2017) and shows a large  
60 differentiation both in its geographical and host distribution (Medeiros, et al. 2013; Chagas, et al. 2017).

61

62 Avian malaria parasites have played a key role in our comprehension of the prevalence, morbidity and  
63 epidemiology of the disease in natural populations (Sylvia M. Fallon, et al. 2005; Valkiūnas 2005). Due to  
64 their high prevalences, widespread distributions and diverse host ranges, they have also been used to address  
65 several evolutionary issues such as host-parasite co-evolution (Charleston and Perkins 2003; Mu, et al. 2005),  
66 virulence evolution (Schall 2002; Bell, et al. 2006), and sexual selection (Spencer, et al. 2005). To date there  
67 are more than 40 morphologically described species of avian *Plasmodium* and over 1200 cytochrome b  
68 lineages, the vast majority of which are thought to be reproductively isolated entities (Bensch, et al. 2004;  
69 Bensch, et al. 2009). *Plasmodium relictum* is the most prevalent and widespread morphospecies of avian  
70 malaria and also has a highly diverse host range (Hellgren, et al. 2015), which places it amongst the top 100  
71 most invasive species (Boudjelas, et al. 2000). This parasite species has also been found to be associated with  
72 the decline and extinction of several bird species on the islands of Hawaii (van Riper, et al. 1986; Atkinson  
73 and LaPointe 2009), with the mortality, in wild, endemic, and indigenous birds in New Zealand (LaPointe  
74 2012) and the mortality of penguins in zoos across the world (Vanstreels, et al. 2015). Of the different  
75 mitochondrial cytochrome b lineages described to date within the morphologic species of *P. relictum* SGS1  
76 the most common in terms of geographic range, host range and host prevalence. This lineage has been found  
77 to infect 129 different bird species, (MalAvi, 2020-05-08, (Bensch, et al. 2009)) and may cause severe disease  
78 and even mortality in wild birds (Palinauskas, et al. 2008; Palinauskas, et al. 2011).

79

80 All *Plasmodium* parasites share a similar life cycle requiring two infection cycles: one in the arthropod vector  
81 and one in the vertebrate host. When competent mosquitoes take an infected blood meal, they ingest both male  
82 (*microgametocytes*) and female (*macrogametocytes*) parasites. Within the first few minutes, the gametocytes  
83 transform into *gametes* and fuse within the midgut to form a diploid *zygote*. The zygotes, in turn, undergo  
84 meiosis, become motile and elongated (*ookinetes*), traverse the wall of the midgut and start to develop into  
85 *oocysts*. Over the course of several days, the oocyst undergoes several rounds of mitosis to create a syncytial  
86 cell with thousands of nuclei. In a massive cytokinesis event, thousands of *sporozoites* erupt from each oocyst  
87 and migrate through the haemocoel towards the salivary glands (Gerald, et al. 2011). Between 10-14 days

88 after the initial infected blood meal, the parasite is in the salivary glands ready to be transmitted to a new host.  
89 When the mosquito takes a second blood meal, it injects sporozoites into the blood of the new host. These  
90 sporozoites multiply in various organs and blood cells of the host and a few days later end up releasing daughter  
91 parasites called *merozoites* into the bloodstream. Merozoites will continue the cycle of the parasite by invading  
92 other red cells and eventually produce the micro- and macrogametocytes which will restart the cycle in the  
93 mosquito (Valkiūnas 2005).

94

95 The complex life cycle of the parasites requires a considerable amount of plasticity to allow them to  
96 successfully invade a variety of widely different tissues in both of its hosts (Valkiūnas 2005; Aly, et al. 2009;  
97 Srivastava, et al. 2016). However, the degree to which this plasticity is achieved through differences in  
98 generegulation of the same genesets or whether different genes are linked to different life stages are yet to be  
99 studied. Within the mosquito, the parasite faces several developmental bottlenecks for determining the  
100 transmissibility of the parasite (Sinden, et al. 2007; Vaughan 2007; Aly, et al. 2009; Akinosoglou, et al. 2015)  
101 : 1) the transition between the ingested micro (male) and macro (female) gametes to the formation of motile  
102 ookinetes, 2) the transition between the ookinete to the oocysts and 3) the transition between oocysts to the  
103 sporozoites in the salivary glands (Valkiūnas 2005). The molecular mechanisms underlying the different  
104 developmental stages of the parasite within the mosquito have to date only been studied in human malaria  
105 (Lindner, et al. 2019) and a few species of rodent malaria species using a non-natural mosquito vector (Xu, et  
106 al. 2005). Therefore, in order to be able to find and study traits and genetic mechanisms that either have been  
107 conserved throughout the genera of *Plasmodium* or finding unique mechanisms linked to host or vector  
108 specificity, there is a need for knowledge of the parasite's molecular mechanisms in the mosquito outside the  
109 limited group of parasites that have been studied to-date (Bozdech, et al. 2003; Otto, et al. 2010; Siegel, et al.  
110 2014; Akinosoglou, et al. 2015; Videvall, et al. 2015; Srivastava, et al. 2016; Videvall, et al. 2017)

111

112 Here, we set out to identify and study the first full transcriptome profile of a non-mammalia malaria  
113 *Plasmodium* as it goes through its different life stages in its natural mosquito vector. First we carry out an  
114 experiment to establish the temporal dynamics of *Plasmodium relictum* (SGS1) development within its natural  
115 vector, the mosquito *Culex pipiens quinquefasciatus*. With this data in hand, we then used RNA sequencing  
116 to obtain the parasite's transcriptome profiles at key points of its development within the mosquito, namely:  
117 1) in the first minutes after ingestion (30 minutes post infection on average, henceforth 30mpi), 2) during the  
118 peak oocyst production phase (8 days post infection, henceforth 8dpi), 3) during the peak sporozoite production  
119 phase (12dpi) and 4) during the latest stages of the mosquito infection when the sporozoites are mainly present  
120 in the salivary glands(22dpi). As a reference point, we also obtain the transcriptome of an infected blood  
121 sample from the host bird taken immediately before the mosquito feed. We discuss how our observations will  
122 open up avenues of investigation into the pathways and molecular mechanisms that have been evolutionary  
123 conserved since the mammalian-avian malaria split.

## 124 **Results**

### 125 **Temporal dynamics of *Plasmodium* development in mosquitoes**

126 The temporal dynamics of *Plasmodium* inside the mosquito were consistent between mosquito groups fed on  
127 the three infected birds (Figure S1). Oocysts first become visible in the mosquito midgut on days 4-6 after the  
128 blood meal and the peak oocyst burdens were reached on days 8-10 (Figure 1, Figure S1). Thereafter a rapid  
129 decrease in the number of oocysts was observed so that by day 12 post blood meal, only between 2-20% of  
130 the peak oocyst burden remains. The first sporozoites appear on the head-thorax homogenate on days 8-10,  
131 only 2-4 days after the first oocysts. Sporozoite concentrations reach the peak on day 12 (Figure 1), except for  
132 the mosquitoes fed on the bird with the lowest parasite load (Bird\_3, Figure S1) where the peak is reached  
133 much later (day 16, Figure S1). Onwards the number of sporozoites decreases steadily but are still detectable,  
134 albeit at low numbers, three weeks after the initial infection (Figure 1).

135

### 136 **Data preprocessing and Sequence Alignment**

137 We assessed the sequence data for quality and contamination. FastQC did not report any sequences having an  
138 overall Phred Score lower than 24, however, six samples had a drop in the quality for last 8-18 bases (Figure  
139 S2), which were trimmed using Trimmomatic. FastQ Screen mapped the reads with an average of 13% to the  
140 Zebra finch, 20% to Canary and 91% to the malaria vector (mosquito) reference sequences. Majority of the  
141 reads from the blood samples obtained from infected bird immediately before the mosquito feed mapped to  
142 the bird reference sequences (**Figure S3A**; Table S2). After removal of reads that uniquely mapped to the birds  
143 and vector genomes, an average of 2% of the remaining reads mapped to the parasite genome (around  
144 0.65Million reads) and were retained for further analysis (Figure S3B;Table S3). On average 71% of paired-  
145 end reads were retained after trimming for low-quality reads and adapter content (Table S4). GC content-based  
146 filtering for the transcriptomic data was not performed as it has been estimated that the GC percentage of  
147 coding sequences (CDSs) are greater than the genomic GC percentage in the *Plasmodium* spp. (Yadav and  
148 Swati 2012). The average GC content and average length of sequences processed by FastQ Screen and  
149 Trimmomatic were 37% and 138bp, respectively (Table S5). HISAT2 produced an average of 77% overall  
150 alignment for the transcriptome data aligned to *P. relictum* genome (Table S6).

151

### 152 **Transcript assembly and Differential Gene Expression Analysis**

153 Transcript assembly and abundance calculation reported 5286 genes (that we found an higher amount of genes  
154 than present is due to that alternative splice variants is interpreted as different genes) in the gene count table,  
155 which include mitochondrial and apicoplast genes (Table S7). Of these, 160 of the genes found in the annotated  
156 genome had no expression data in any of the samples and were dropped from further analysis as they did not  
157 contribute to any information to the analysis. The remaining 5126 genes were analyzed for differential gene  
158 expression using the DESeq2 package in the R statistical suite. A principal component analysis of expression  
159 clustered parasite samples belonging to the same time point together (Figure 2A). The samples are separated

160 on PC1 (53% variance), which explained the time from the start of infection and is indicative of parasite growth  
161 (30mpi -> 8dpi -> 12dpi -> 22dpi). The samples clustered around the given timepoints indicating that the  
162 biological replicates displayed a similar expression profile.

163

164 Four time points (30mpi, 8dpi, 12dpi, and 22dpi) were compared for *P. relictum* genes differentially expressed  
165 against the bird samples. As baseline control, we used the transcriptomic profile of the parasite in the vertebrate  
166 host immediately before the blood meal (bird samples). The analysis reported 71, 311, 605 and 421  
167 significantly differentially expressed genes for each of the time points (Table 2, Table S8-S11). Over 60% of  
168 these genes were found to be downregulated (Figure 3; Figure S6). Genes that were significantly  
169 downregulated with respect to the baseline, were interpreted as being highly expressed genes that are linked  
170 to the development within the vertebrate host. (Figure 4). For this study, we therefore only considered the  
171 genes that were significantly upregulated within the mosquito as compared to our baseline controls.

172

173 Two genes were reported to be upregulated at all time points versus Bird. One of these genes had a known  
174 function associated with 28S ribosomal RNA and the other one was a conserved *Plasmodium* membrane  
175 protein with unknown function. The genes involved in sporozoite invasion, TRAP-like protein, early  
176 transcribed membrane protein, cysteine repeat modular protein, oocyst capsule protein Cas380, p25-alpha  
177 family protein, Circumsporozoite protein (CSP) were upregulated in all stages except the 30mpi stage. Two  
178 reticulocyte binding proteins were upregulated during all stages except the 30mpi stage. Several other  
179 conserved *Plasmodium* proteins with unknown function were also reported to be upregulated across  
180 timepoints. These results are summarized in Table 3, and detailed information about the corresponding genes  
181 is included in the Supplementary File (Table S12).

182

### 183 **Gene Ontology Enrichment**

184 Annotations for 2583 *P. relictum* genes were retrieved from PlasmoDB database. Gene ontology (GO)  
185 enrichment analysis revealed distinct GO enriched at different time points (Figure 5; Figure S7; Figure S8).  
186 GO terms associated with pseudouridine synthesis were enriched for the 30mpi time point, several GO terms  
187 related to oxidoreductase activity were enriched for 8dpi, GO terms related to rhoptry neck, entry into host  
188 cell (vector in our study) and membrane part were enriched for 12dpi, and GO terms related to locomotion,  
189 regulation of RNA metabolic process and lipid metabolic processes were enriched for 22dpi. GO terms related  
190 to DNA-binding transcription factor was enriched from 8dpi to 22dpi. GO terms related to exit from host,  
191 movement in host environment (vector in our study) and protein kinase activity were enriched during the late  
192 stages of infection (12dpi and 22dpi). Most of the significantly overexpressed GO terms were supported by  
193 only a few genes (Table S13-S16).

194

195



## 196 **Discussion**

197 *Plasmodium* undergoes complex molecular processes during its lifecycle to successfully invade the vector and  
198 overcome its defence mechanisms to continue the infection cycle. However, our knowledge about the  
199 processes, pathways and enzymes involved during these stages in non-human malaria parasites is limited to  
200 studies of rodent malaria parasites using a non-natural vector (Xu, et al. 2005). Given the well-documented  
201 differences in parasite performance between natural and non-natural *Plasmodium*-mosquito combinations  
202 (Aguilar, et al. 2005; Cohuet, et al. 2006; Jaramillo-Gutierrez, et al. 2009), these latter results have to be  
203 interpreted with caution. In this study, we study the transcriptome of *Plasmodium relictum* in its natural vector:  
204 the *Culex pipiens* mosquito. The average transcriptome GC content for the reads retained after quality control  
205 and that mapping to the *P. relictum* genome was calculated to be higher than that of *P. falciparum* and the  
206 avian malaria genome of *P. ashfordi* (Videvall, et al. 2017) (Figure S4). This could be due to the variation in  
207 codon usage bias and gene regulation mechanisms between the species as explained by Yadav *et al.* (Yadav  
208 and Swati 2012). Here, we computed the correlation between the duplication level and GC content (Figure S5)  
209 but did not investigate this issue any further. The PC analysis (Figure 2A) clustered the samples belonging to  
210 the same time point together, with a clear separation along the PC1 axis, as expected when same time points  
211 share similar expression profiles. However, two samples, one from 8dpi and one from 12dpi, corresponding to  
212 the peak oocyst and peak sporozoite formation (Figure 1), clustered half-way between these two time points,  
213 indicating an active transition stage. The fact that these two samples originate from the same individual bird,  
214 suggests that this is due either to a delay (8dpi) or an early onset (12dpi) of the infection in the mosquitoes due  
215 to differences between the birds. These differences could stem from differences in bird parasitaemia which are  
216 known to influence gene expression of the parasites in the host (Videvall, et al. 2017). We note that both of  
217 these intermediate samples come from the bird with the highest parasitaemia (bird #2: 7.33%, birds #1 and #3  
218 had 5.12% and 4.48%, respectively).

219

### 220 **1. Invasion genes are expressed throughout the sporogonic cycle**

221 The majority of the genes in the parasite genome, apart from 160 genes, are expressed at one stage or other in  
222 the parasite's life cycle within the mosquito. The differential gene expression analysis revealed that less than  
223 40% of the total genes were upregulated at a given time point during the infection cycle in the vector as  
224 compared to our baseline control. The transition from gametocyte activation in the mosquito midgut (30mpi)  
225 to the salivary gland invasion by sporozoites (8dpi to 22dpi, Figure 1) is associated with the expression of  
226 several important genes specific to mobility, entry into the host, DNA transcription and pathogenesis (Table  
227 S12). These include a putative sporozoite invasion associated protein, which is reported to participate in host-  
228 pathogen interactions during cell-traversal (Arévalo-Pinzón, et al. 2011), a Thrombospondin-related protein 1  
229 and a Cysteine repeat modular protein 4 (CRMP4) which facilitate the salivary gland invasion. These genes  
230 have been found in previous human malaria (Wengelnik, et al. 1999; Thompson, et al. 2007) and rodent malaria  
231 studies (Sultan, et al. 1997; Thompson, et al. 2007; Douradina, et al. 2011) indicating that these genes are

232 evolutionary conserved. The oocyst growth and the sporozoites release are concomitant during a long period  
233 of time (Figure 1). We observe several genes which are associated with sporozoite development to be  
234 upregulated throughout the 8dpi-22dpi transition. Consistent with previous reports (Warburg, et al. 1992;  
235 Ménard, et al. 1997b; Wang, et al. 2005; Coppi, et al. 2011; Aldrich, et al. 2012), our analysis revealed  
236 Circumsporozoite protein (CSP) to be upregulated during these stages. CSP is a key gene having a  
237 multifunctional role in oocyst development, formation of sporoblast and sporozoites, salivary gland infection,  
238 onset of sporozoites invasion, sporozoite mobility, salivary gland invasion and hepatocyte infection (Warburg,  
239 et al. 1992; Ménard, et al. 1997a; Wang, et al. 2005; Aly, et al. 2009). Interestingly, three genes associated  
240 TRAP-like proteins (TLP) were also found to be upregulated during these stages, which is in line with studies  
241 that have reported TLP to an important player in sporozoite cell traversal (Moreira, et al. 2008). Oocyst capsule  
242 protein Cap380, reported to be active during the oocyst development, sporozoite differentiation and disruption  
243 of this genes may affect parasite's ability to invade host or vector cells (Srinivasan, et al. 2008), was also in  
244 our study upregulated during this transition highlighting its essential role in the parasite growth within the  
245 vector. In contrast to previously reported, two Reticulocyte-Binding Proteins (RBPs) which are involved in  
246 red blood cell invasion (Videvall, et al. 2017), were upregulated during 8dpi-22dpi transition. Due to sequence  
247 divergence, we cannot know with certainty which of the RBPs is the orthologous gene to the RBP we identified  
248 in this study. This suggests, either that these genes, which play a crucial role in the blood stages of the parasite,  
249 have pleiotropic effects in the mosquito, or that they are RBPs-like genes that have acquired another function  
250 in the avian malaria system.

251

## 252 **2. Gene expression during the different stages in vector**

253 Along with the number of invasive genes, several genes were specifically upregulated during a certain  
254 timepoint (Table S12).

### 255 *2.1. During 8dpi and 12dpi*

256 Secreted ookinete protein 25 was upregulated at both these time point (8dpi and 12dpi) which are characterised  
257 by peak oocyst formation and peak sporozoite concentration, respectively. Secreted ookinete protein 25 is  
258 reported to affect ookinete formation and the formation of midgut oocysts (Zheng, et al. 2017). Other genes  
259 that are upregulated during this transition are genes involved in motility, *Plasmodium* exported protein  
260 (PHIST), asparagine-rich antigen, neurotransmitter, oxidation-reduction process and surface related antigen  
261 SRA.

### 262 *2.2. During 12dpi and 22dpi*

263 Genes involved in sporozoite maturation and cell invasion, copies of erythrocyte membrane-associated antigen  
264 and reticulocyte binding proteins were also upregulated during the later stages of infection (12dpi to 22dpi).  
265 These include sporozoite surface protein 3, Thrombospondin-related anonymous protein (TRAP), CRMP1,  
266 CRMP2 and Calcium dependent protein kinase 6 (CDPK6). RBPs are essentially involved in erythrocyte  
267 invasion (Videvall, et al. 2017) and along with Sporozoite surface protein, CRMP1 and CDPK6, effectively



268 invade the salivary gland during the later stages of the infection (Mota, et al. 2002; Aly, et al. 2009). Sporozoite  
269 micronemal protein essential for cell traversal (SPECT1), a key gene involved in host cell traversal (Mota, et  
270 al. 2001), are also upregulated during this transition. TRAP is a key player in the attachment and parasite  
271 invasion of the salivary glands (Sultan, et al. 1997). Other interesting genes upregulated during this transition  
272 are putative plasmepsin X, which is involved in entry and exit into the host cell, and several copies of  
273 serine/threonine protein kinase and eukaryotic translation initiation factor 2-alpha kinase 2, which are involved  
274 in ATP binding and protein kinase activity and 6-cysteine protein which affects the sporozoites' ability to  
275 invade host cells.

### 276 2.3. *During 30mpi*

277 Our analysis also reported genes which are exclusive to each time point (Table S12). We identified 4 genes  
278 upregulated exclusively during the 30mpi stage. One such gene, Putative schizont egress antigen-,1 is  
279 exclusively upregulated and is amongst genes upregulated only at this time point. Studies with *Plasmodium*  
280 *falciparum* have reported that inhibiting this gene prevents the schizonts from leaving the infect RBCs thereby  
281 affecting infection (Raj, et al. 2014). Whether this affects the zygote production by reducing differentiation of  
282 male and female gametocytes is an interesting question to explore. Three other conserved *Plasmodium* protein  
283 with unknown functions were also upregulated during this stage suggesting a direct or indirect role in  
284 successful parasite infection and/or zygote development.

### 285 2.4. *During 8dpi*

286 At the 8dpi time point, we observed an upregulation of several genes involved in translation initiation : ATP  
287 dependent RNA helicase DBP1, and eukaryotic translation initiation factor 4E. We also found several genes  
288 associated with carbon and TCA cycle. These included NADP-specific glutamate dehydrogenase, succinyl-  
289 CoA ligase, phosphoenolpyruvate carboxylkinase. Previous studies in *P.falciparum* have reported that carbon  
290 and TCA cycle are critical for oocyst production and maturation (Srivastava, et al. 2016). We also identified a  
291 putative gene, coproporphyrinogen-III oxidase know to be associated with oxidation-reduction processes  
292 which are known to be critical processes for parasite growth under stress condition such as against the host  
293 defence mechanism in mosquito vector. As observed in the temporal dynamics of the parasite development in  
294 the vector, our analysis supports the hypothesis that this stage is marked by the peak oocyst production in the  
295 infection cycle and suggests that these genes might have a critical role in cell regulation metabolism in  
296 *Plasmodium* species.

### 297 2.5. *During 12dpi*

298 Several genes involved in oocyst rupture were reported to be significantly upregulated exclusively during the  
299 stage which is marked by the peak of oocysts burst and sporozoite release (12dpi). These included oocyst  
300 rupture protein 1 and oocyst rupture protein 2 (Siden-Kiamos, et al. 2018). Genes involved in host cell  
301 invasion, such as putative rhoptry neck protein (RON6), merozoite surface protein 1 paralog and rhomboid  
302 protease ROM1 were also found upregulated during this stage. Other upregulated genes included lysine-  
303 specific histone demethylase, which is associated with oxidoreductase activity, putative inorganic anion

304 exchange, involved in sulfate transmembrane transporter activity, and cGMP-specific phosphodiesterase. A  
305 previously reported protein involved in mobility and infectivity of the ookinetes, CDPK3 (Siden-Kiamos, et  
306 al. 2006), and one conserved *Plasmodium* protein associated with microtubule based movement was also  
307 upregulated along with several other conserved *Plasmodium* proteins with unknown functions, suggesting their  
308 role in oocyst maturation and rupture, sporozoite formation, release and transportation.

### 309 2.6. *During 22dpi*

310 The last time point (22dpi) characterised by the low density of sporozoites. During this time, the sporozoites  
311 are mainly present in the salivary glands. Putative sporozoite and liver stage asparagine-rich protein (SLARP)  
312 and CDPK5 are upregulated during this timepoint. These proteins which are reported to have a role in the  
313 regulation of transcription, have been previously described in *Plasmodium falciparum* (Silvie, et al. 2008; Aly,  
314 et al. 2011). Upregulation of these genes and other genes involved in kinase activity – serine/threonine protein  
315 kinase, inositol polyphosphate multikinase, suggests an essential role in invasion mechanism during this  
316 transition. Some of the previously reported stage specific markers identified in other *Plasmodium* species was  
317 not observed in our study, such as UOS3 (Mikolajczak, et al. 2008; Combe, et al. 2009; Steinbuechel and  
318 Matuschewski 2009) , MAEBL (Kariu, et al. 2002) , CelTOS (Kariu, et al. 2006). If this pattern is due to  
319 methodological reasons or a true biological difference we cant determine at this point but is important to  
320 disentangle in future studies in order to understand how the gene functions have evolved across the different  
321 species.

322

### 323 3. Role of AP2 transcription factors in the sporogonic cycle

324 Several copies of putative AP2 domain transcription factors are active during the infection, and our analysis  
325 also captures a few specific AP2 transcription factors associated with the various stages of parasite  
326 development. Previous studies have reported the functional role of AP2-SP2 during the sporozoite formation  
327 (Yuda, et al. 2010). In our analysis, we identified this transcription factor to be upregulated from 8dpi to 22dpi.  
328 Previous finding report that AP2-O3 is associated with ookinete formation, gliding and invasion (Modrzynska,  
329 et al. 2017). However the direct target of this transcription factor is unknow. We observe AP2-O3 (putative)  
330 to be upregulated at 8dpi, which might suggest that AP2-O3 regulates genes during the peak oocyst stage.  
331 Putative AP2-EXP which, in *P. falciparum*, AP2-EXP is reported to regulate virulence genes (Martins, et al.  
332 2017), is upregulated exclusively at 12dpi. Our results are consistent with previous studies in *P. berghei*  
333 (Yuda, et al. 2010) where AP2-EXP has been shown to be expressed specifically during the sporozoite stage.  
334 AP2-L, an AP2 transcription factor associated with liver exoerythrocytic stages (Iwanaga, et al. 2012) and  
335 sporozoites (Yuda, et al. 2010) was also found to be upregulated during the 22dpi stage of infection. We also  
336 identified upregulation of AP2-O5 during this stage. Even though the role of AP2-O in activation of genes  
337 associated with ookinete mobility and oocyst development has been previously established (Yuda, et al. 2009),  
338 the exact function of AP2-O5 during the sporozoite stage is unclear. Furthermore, several copies of putative  
339 AP2 transcription factors were upregulated throughout the duration of infection suggesting that these

340 transcription factors might be responsible for regulation of specific genes in the respective stages of infection.  
341 This could be explained by the fact the experiment is conducted *in vivo* and that the different parasite  
342 development stages are not completely separate in time. Many copies of AP2 genes indicate that there are  
343 several transcriptional factors that are associated and active at different time points, indicating the strong  
344 importance of these transcription factors during the entire infection process. This also suggests that AP2 genes  
345 might have very selective roles in the parasite development processes and are tightly regulated. The presence  
346 of these essential genes in distantly related mammalian and avian *Plasmodium* also suggest that they share  
347 some essentially conserved genes (Aly, et al. 2009).

348

#### 349 **4. GO enrichment revealed highly stages specific pathways and metabolism**

350 The different *Plasmodium* species have diverged over time and several genes might have been lost or aquired  
351 during the evolution. Many of the genes in the *P. relictum* genome are uncharacterized (Böhme, et al. 2018).  
352 This potentially limits our ability to pin down all the essential mechanism during the lifecycle of the parasite.  
353 To strengthen our understanding of the biological functions behind some of the transcribed genes, we make  
354 use of Gene Ontology (GO) system of classification for the genes. GO enrichment allows to establish if the  
355 genes of interest are associated with certain biologicalbased on statistical testing. For this purpose, we used  
356 the up-to-date annotation for *Plasmodium relictum* from PlasmoDB which includes both experimentally  
357 validated and computationally predicted GO terms. We observed several GO terms enriched in a very time  
358 specific manner suggesting the coordinated regulation of these processes during the development of the  
359 parasite (Table S13-S16).

##### 360 4.1. *30mpi*

361 Only a few GO terms were significantly enriched for the upregulated genes in 30mpi stage. These included  
362 pseudouridine synthesis, pseudouridine synthesis activity and intermolecular transferase activity. This is  
363 indicative of an active progress during this stage of gamete maturation and zygote formation. The successful  
364 production of zygotes and the ookinete formation is supported by the overexpressed pseudouridine synthesis  
365 which is directly associated with macromolecule modification. Surprisingly, we also saw the GO term  
366 associated with reproduction (GO:0000003) being reported amongst the top 20 GO terms enriched for  
367 biological processes. This term was, however, statistically not significant in our analysis (Figure 5; Table S13),  
368 probably due to the limitation in the available knowledge regarding the genes annotated to this term.

##### 369 4.2. *8dpi*

370 At 8dpi the repeated nuclear division (endomitosis) in oocysts is almost at its peak. This stage is enriched for  
371 GO terms associated with oxidoreductase activity, carbohydrate biosynthesis process, DNA binding  
372 transcription factor and cell surface (Figure 5; Table S14). Consistent with DGE analysis, transcription and  
373 metabolic processes are active and essential for energy demand during parasite growth and transition  
374 (Srivastava, et al. 2016). This analysis also reveals the overexpression of oxidation-reduction process which  
375 supports regulation of redox balance in the parasite. During infection, the parasites can fight the host's immune

376 oxidative stress mechanism by altering the redox balance and antioxidant defence system (Becker, et al. 2004;  
377 Müller 2004).

#### 378 4.3. *12dpi*

379 The 12dpi stage is associated with overexpressed GO terms associated with the exit from the host cell,  
380 movement in the host environment, interspecies interactions, multi-organism processes (meaning interaction  
381 between organisms), protein phosphorylation, and entry into the host cells. The overexpression of these GO  
382 terms along with overexpression of GO terms associated with cell surface, membrane parts and integral  
383 component of membrane, reflects the crucial role of these pathways in toocyst maturation, sporozoite release  
384 and invasion (Patzewitz, et al. 2013)( Figure 5; Table S15). Other GO terms relating to the interaction with the  
385 host, the formation of the parasite's cellular and its mobility within the host seem to be critical for the parasite  
386 entry and transmission (Aly, et al. 2009). Enrichment of the GO term rhoptry neck indicates a host cell invasion  
387 mechanism active during this transition. Several molecular functions related to protein domain specific  
388 binding, DNA binding transcription factor activities and a number of protein kinase activities are also enriched  
389 during this stage, which are indicative of active transition from oocyst to sporozoite formation.

#### 390 4.4. *22dpi*

391 A wide range of biological processes are associated to the genes upregulated during the later stage of the  
392 infection (22dpi). The overexpressed GO terms are associated with the exit from host cell (vector cells in our  
393 study), movement in the host environment (vector cells in our study), protein phosphorylation, regulation of  
394 RNA metabolic processes, interaction between organisms, regulation of transcription, interspecies interaction  
395 and regulation of RNA metabolic process. The molecular functions that are overexpressed are associated with  
396 DNA-binding transcription factors, and transcription regulator, protein kinase and phosphotransferase  
397 activities (Figure 5; Table S16). Previous studies have shown the importance of parasite protein kinases  
398 throughout the growth and development of the parasite, reviewd in (Doerig, et al. 2008), and our analysis also  
399 suggests that these pathways have an essential role in gene regulation for sporozoite invasion. It is suggested  
400 that these pathways have a key role in the stage specific development of the parasite. However, several of the  
401 interesting GO terms were not significant according to our cutoff ( $p < 0.01$ )(Figure S8). Our analysis were also  
402 heavily influenced by the existing GO annotation of the genes. Hence these observations have to be considered  
403 with caution. Since not a lot is known about the metabolism and enzymes in these stages, this work provides  
404 first-hand insight into the mechanism of the parasite in the vector system.

405

## 406 **Conclusion**

407 This is the first study to provide a comprehensive insight into the molecular mechanism of one of the most  
408 harmful avian malaria parasite *P. relictum* in *Culex quinquefasciatus*, its natural vector thereby providing  
409 valuable knowledge about the genes involved in critical transitions in the lifecycle of the parasite. We have  
410 captured a snapshot of genes associated with host immunity, even the one lowly expressed, during at all stages  
411 during infection within the vector. We identified several known genes associated with cell invasion along with

412 several gene with unknown functions specific to different infection stages of the parasite life cycle, which can  
413 be potential candidates for functional studies. We also identified copies of reticulocyte binding proteins  
414 upregulated during different stages of the infection, either suggesting a that these proteins have a wider  
415 function than previously thought or that they have evolved a different function in *P. relictum*. We also  
416 identified many significant genes specific to different stages of parasite development in this analysis. Although  
417 only upregulated genes were considered for this study; we acknowledge that downregulated genes could have  
418 a potential cascading effect on the parasite growth which may have been missed in our analyses. Some of the  
419 genes have been studied using genetic knockout mutants and their functions have been validated  
420 experimentally. However, a large portion of the parasite genome remains uncharacterized *Plasmodium* genes,  
421 which limits our ability to list all active genes during the sporogonic cycle. Future research will help determine  
422 the function and features of these genes. This work also contributes to improve the genetic resources for *P.*  
423 *relictum*. The knowledge gathered from this study could contributes to our understanding of the critical stages  
424 in *Plasmodium* life cycle and could be used as an active model to further conduct specific studies on targeted  
425 genes related to invasion. As a result, this work provides us with an insight into the functional relatedness and  
426 mechanism of the development of different *Plasmodium* species within the vector. This can inform further  
427 research aimed at devising broader ecological solutions regarding the disease control and conservation  
428 programs.

429

## 430 **Methods**

### 431 **Temporal dynamics of *Plasmodium* sporogony protocol**

432 To establish the temporal dynamics of *Plasmodium relictum* (SGS1) development within its natural vector,  
433 the mosquito *Culex pipiens quinquefasciatus*, experiments were carried out in three birds (*Serinus canaria*)  
434 which were infected using standard infection protocols (Pigeault, et al. 2015). Ten days later, at the peak of  
435 the acute infection stage, each bird was placed overnight in a separate experimental cage with 180 7-day old  
436 female mosquitoes (Vézilier, et al. 2010). After the mosquitoes had taken a blood meal, the birds were removed  
437 from the cages and the mosquitoes were supplied with 10% *ad libitum* sugar solution until the end of the  
438 experiment. Every two days, starting on day 4 and finishing on day 26 post-blood meal, twelve mosquitoes  
439 were haphazardly sampled from each cage. Each mosquito was dissected to count the number of oocysts in  
440 the midgut, and its head-thorax was preserved at -20°C for the quantification of the transmissible sporozoites.  
441 Developing oocysts were counted under the microscope (Vézilier, et al. 2010). Sporozoites were quantified  
442 using real-time quantitative PCR as the ratio of the parasite's *cytb* gene relative to the mosquito's *ace-2* gene  
443 (Zélé, et al. 2014).

444

### 445 **Parasite transcriptomic experimental protocol**

446 In the next experiment, Mosquitoes (*Cx. pipiens quinquefasciatus*) were experimentally infected with *P.*  
447 *relictum* (SGS1) by allowing them to feed from 3 canaries (*Serinus canaria*) which had been previously



448 infected using standard laboratory protocols (Pigeault, et al. 2015). The experimental protocol proceeded as  
449 follows. On the day of the experiment (day 0), immediately before the beginning of the experiment, 20µl  
450 blood from the bird's wing was sampled. A drop of blood was used to quantify parasite load via a blood smear  
451 (as described by (Valkiūnas 2005), the rest was mixed with 500µl of Trizol (Life Technologies, Carlsbad, CA,  
452 USA) and frozen at -80°C for subsequent RNA extraction (henceforth 'bird' sample). Seven-day old female  
453 mosquitoes, reared using standard laboratory protocols (Vézilier, et al. 2010), were introduced into each of the  
454 cages 19 hours after the start of the experiment (150 female mosquitoes per cage). Cages were visited 30  
455 minutes later and 20 fully-gorged resting mosquitoes were haphazardly sampled from each of the cages  
456 (henceforth '30 minutes post infection (30mpi) ' sample). Half of the mosquitoes were immediately  
457 homogenised, mixed with 500µl of Trizol and frozen at -80°C for subsequent RNA extraction (1 tube per  
458 cage). The rest of the mosquitoes were individually frozen at -80°C. The bird was taken out at the same time,  
459 and the rest of the mosquitoes were left in the cage with a source of sugar solution (10%) at our standard  
460 insectary conditions (25-27°C, 70% RH). On day 8 after the start of the experiment, to coincide with the peak  
461 of oocyst production as estimated by the previous experiment, 30 further mosquitoes were randomly taken  
462 from each of the cages (henceforth '8 dpi' sample). For each cage, 10 of these mosquitoes were homogenised  
463 and conserved in 500µl RNAlater (ThermoFisher Scientific/Ambion, Waltham, USA). The procedure was  
464 repeated on day 12 to coincide with the peak sporozoite production ('12 dpi' sample) and on day 22 during  
465 the late stage of the infection ('22 dpi' sample).

466

#### 467 **RNA extraction**

468 RNA from the bird blood samples was extracted with a combination of Trizol LS and RNeasy Mini spin  
469 columns (Qiagen, Hilden, Germany). Homogenizing and phase separation was done according to the TRizol  
470 LS manufactures protocol resulting in an aqueous phase which was then mixed with one volume of 70%  
471 ethanol and placed in a RNeasy Mini spin column. From this point on the RNeasy Mini spin columns  
472 manufactures protocol was followed.

473 RNA from the 30mpi samples (collected in Trizol LS) were disrupted and homogenized using a TissueLyser  
474 (Qiagen, Hilden, Germany). Ten whole mosquitoes were collected in 500 µl of Trizol LS, the total volume of  
475 TRizol LS was adjusted to 750 µl and a 5 mm stainless steel bead was added. The TissueLyser was run for  
476 two cycles of three minutes at 30 Hz. Phase separation was done according to the TRizol LS manufactures  
477 protocol resulting in an aqueous phase which was then mixed with one volume of 70% ethanol and placed in  
478 a RNeasy Mini spin column. From this point on the RNeasy Mini spin columns manufactures protocol was  
479 followed.

480 RNA from the 8dpi, the 12dpi and 22dpi samples (collected in RNAlater) were extracted with RNeasy Mini  
481 spin columns following the manufactures protocol. Disruption and homogenization were done using a  
482 TissueLyser (Qiagen, Hilden, Germany). Ten whole mosquitoes were moved to a new tube and 600 µl of



483 buffer RLT was added as well as a 5 mm stainless steel bead. The TissueLyser was run for two cycles of three  
484 minutes at 30 Hz.

485 The concentration of all RNA samples was measured on a Nanodrop 2000/2000c (Thermo Fisher Scientific,  
486 Wilmington, DE, USA). Dried in samples were shipped on dry ice to Novogene (Hong Kong) for mRNA  
487 sequencing. mRNA from each time point was sequenced using Illumina HiSeq platform at an average of 85  
488 M reads per library. We obtained paired-end reads of 150bp length for 15 sequenced transcriptomes which  
489 were used for further analysis.

490

#### 491 **Data preprocessing**

492 We examined the RNA-Seq reads for quality, per-base sequence content, adapter content and overrepresented  
493 sequences using FastQC (Version 0.11.5) (Andrews, et al.). Contamination due to other genomes such as  
494 human and bird was estimated using FastQ Screen (Version 0.11.1) (Wingett and Andrews 2018). FastQ  
495 Screen maps the raw-reads to the indexed reference genome using Bowtie 2 (Langmead and Salzberg 2012)  
496 or BWA (Li and Durbin 2009) to calculate an estimate of the reference genome contamination in query  
497 sequences. We screened the transcriptome sequences against genomes of Zebra Finch  
498 (*GCF\_000151805.1-Taeniopygia\_guttata-3.2.4*) and *Serinus canaria* (*GCF\_000534875.1\_SCA1*) for bird  
499 references, mosquitoes (*GCF\_000209185.1\_CulPip1.0*) for malaria vector and *Plasmodium relictum* genome  
500 (*GCA\_900005765.1\_PRELSG*) and indexed using Bowtie2 (Version 2.3.1). Birds infected with the parasites  
501 in our study was *Serinus canaria* hence we used this genome for screening transcripts along with Zebra Finch  
502 genome which is widely used as bird model genome. The genomes were retrieved in the form of Fasta  
503 sequences from NCBI Genome browser (<https://www.ncbi.nlm.nih.gov/genome>). All the reads that did not  
504 map uniquely to human, bird and malaria vector reference genomes were filtered out using -filter function in  
505 FastQ Screen. Adapter sequences, ambiguous nucleotides, and low-quality sequence were trimmed off using  
506 Trimmomatic (Version 0.36) (Bolger, et al. 2014). We used paired-end mode with options -phred33 for base  
507 quality encoding, a sliding window of 4:20, the minimum sequence length of 70, trailing 3 and leading 3. We  
508 used the standard Illumina adapter sequences (option: ILLUMINACLIP Truseq3-PE.fa:2:30:10) available in  
509 Trimmomatic to screen and trim the adapter sequences from the query. The choice of parameters was made  
510 after examining the reads for quality and presence of adapter sequences. Once trimmed, the sequences were  
511 again evaluated for quality (FastQC) before proceeding to the following steps. MultiQC (Ewels, et al. 2016),  
512 which summarizes results from various tools and generate a single report, was used for illustrative purpose.

513

#### 514 **Read alignment, transcript assembly and abundance calculation**

515 The filtered and trimmed sequence files were aligned to *Plasmodium relictum* published genome  
516 (*GCA\_900005765.1\_PRELSG*) using HISAT2 (Version 2.1.0) (Kim, et al. 2015). All the sequence files were  
517 aligned as paired end reads and with default parameter settings. HTseq-count (Anders, et al. 2015) (parameters:  
518 -s no -t gene -i locus\_tag) is used to calculate the read count for each sample and custom bash scripts were

519 written to post-process the files to generate gene count matrix. Scripts and more detailed parameter explanation  
520 for this process can be provided upon request.

521

## 522 **Differential Gene Expression Analysis**

523 The differential gene expression analysis was performed in DESeq2 (Version 1.16.1) (Love, et al. 2014)  
524 package in R. Genes with no expression across all samples i.e. genes with zero read across all samples were  
525 filtered out from the gene count table before analysing the data further. To avoid having any bias in the analysis  
526 and to examine the data further, variance stabilized transformation of counts (Anders and Huber 2010) was  
527 used to perform PCA. Plots and visualization were made using RColorBrewer, genefilter, dplyr, and ggplot2  
528 packages in R.

529 Differential gene expression (DGE) was performed with the filtered gene count matrix. As DESeq2 normalizes  
530 the data within the method for library size difference, the gene count matrix was not transformed or normalized  
531 beforehand for the analysis. The bird samples were considered as a reference to perform DGE analysis. The p-  
532 value for DEG was set to 0.01 and the four cases were defined for the DGE analysis. The significantly  
533 differentially expressed upregulated genes (having positive log<sub>2</sub> fold change in our comparison) after  
534 foldchange and adjusted p-value sorting, from the four cases (30dpi vs bird, 8 days post-infection (dpi) vs  
535 bird, 12dpi vs bird, 22dpi vs bird) were considered for further enrichment analysis. The genes from all the  
536 cases were compared cross-wise to identify genes common in all stages and the genes exclusive to a certain  
537 stage of infection.

538

## 539 **Gene Ontology Enrichment Analysis**

540 To look for functions that were significantly overrepresented among the upregulated genes at the different  
541 stages we conducted a Gene Ontology Enrichment analysis. The significantly differentially expressed  
542 upregulated genes were analysed to identify overrepresented Gene Ontology (GO) terms using the topGO  
543 package (Alexa and Rahnenfuhrer 2019) in RStudio (Version 1.0.143). TopGO allows enrichment analysis for  
544 GO terms for custom background annotation. It also allows a flexible testing framework with support to many  
545 different algorithms. The GO annotation for SGS1-like strain was downloaded from PlasmoDB  
546 (<http://plasmodb.org/plasmo/>) and customised to fit the input format required by topGO. The background for  
547 analysis for each case is the list of genes and their p-adjusted values as reported by DESeq2. All the  
548 significantly differentially expressed upregulated genes from each case were analysed independently to identify  
549 the ontologies enriched specifically for each stage of the parasite's life cycle. The enrichment analysis is  
550 performed using classical algorithm and Fisher's exact test and the GO terms with p value < 0.01 are  
551 considered enriched. The overrepresented GO terms were reported from all three domains: biological processes,  
552 molecular functions and cellular components.

553

## 554 **Acknowledgements:**

555 This study was funded by the Swedish Research Council (grant 2016-03419) and Nilsson-Ehle foundation to  
556 O.H. A.R. was funded through the ANR-16-CE35-0001-01 ('EVODRUG').

557

#### 558 **Author Contributions:**

559 O.H. planned and designed the study with input from A.R and S.G. A.R and S.G. designed and performed the  
560 mosquito experiment for the RNA sequencing. V.S. performed the bioinformatic and statistical analyses with  
561 help and advice from D.A. and O.H. R.P. performed and analyzed the experiment that determined the timing  
562 of the life stages in the mosquito. A.D. performed the molecular labwork. V.S. wrote the article with input  
563 from all authors.

564

#### 565 **Figure Legends:**

566 **Figure 1: Temporal dynamics of *Plasmodium* development in mosquitoes** Average oocyst burden (blue)  
567 and sporozoite (red) counts at each dissection day. Blue and red shadows represent standard error. The left  
568 axis represents the average number of oocysts counted per female. The right axis represents the amount of  
569 sporozoites quantified by qPCR as the ratio of the parasite's *cytb* gene relative to the mosquito's *ace-2* gene.  
570 Light grey areas represent three of the five sampling points used to study the *Plasmodium* transcriptome.

571 **Figure 2A: PCA plot with variable stabilizing transformation.** The samples cluster together around each  
572 the time point (different stages of parasite life cycle in the mosquito). However, one 8dpi sample (from  
573 replicate 2) and one 12dpi sample (from replicate 1) cluster close to each other and away from their  
574 corresponding time point. These results are supported supported by the heatmap (B). **2B: Heatmap**  
575 **portraying Euclidian distance measured between the different samples.** Lighter color indicates greater  
576 distance.

577 **Figure 3: Volcano plots showing log<sub>2</sub> fold change in expression on the x-axis and P-adjusted values on**  
578 **the y-axis for each of the 4 time points.** Each dot represents a different gene. Differentially expressed genes  
579 with an adjusted p-value < 0.01 and absolute fold change > 0 are colored blue (upregulated) and  
580 differentially expressed genes with an adjusted p-value < 0.01 and absolute fold change < 0 are colored  
581 orange (downregulated).

582 **Figure 4: Venn diagram representing a crosswise comparison of upregulated genes in each of the 4 time**  
583 **points.** Orange (30mpi), Green (8dpi), Blue (12dpi) and Red (22dpi). 2 genes are upregulated during all stages  
584 of infection versus Bird whereas 4, 22, 63 and 41 genes are exclusively upregulated during the 30mpi, 8dpi,  
585 12dpi and 22dpi timepoints versus Bird, respectively.

586 **Figure 5: Gene ontology enrichment analysis for upregulated DEGs.** Simplified figure shows the GO  
587 terms significantly enriched (pvalue < 0.01) for different biological processes, molecular functions and cellular  
588 components for each time point as compared to the bird baseline . Dark color indicates higher pvalue.

589

#### 590 **Tables**

591 **Table 1. Experimental setup and sample details**

| Sample ID | Sample source   | Bird number | Timepoint              |
|-----------|-----------------|-------------|------------------------|
| 1         | Mosquito        | Bird 1      | 8 days post infection  |
| 2         | Mosquito        | Bird 1      | 12 days post infection |
| 3         | Mosquito        | Bird 1      | 22 days post infection |
| 4         | Mosquito        | Bird 2      | 8 days post infection  |
| 5         | Mosquito        | Bird 2      | 12 days post infection |
| 6         | Mosquito        | Bird 2      | 22 days post infection |
| 7         | Mosquito        | Bird 3      | 8 days post infection  |
| 8         | Mosquito        | Bird 3      | 12 days post infection |
| 9         | Mosquito        | Bird 3      | 22 days post infection |
| 10        | mosquito+blood* | Bird 1      | 30mins post infection  |
| 11        | mosquito+blood* | Bird 3      | 30mins post infection  |
| 12        | mosquito+blood* | Bird 2      | 30mins post infection  |
| 13        | Blood           | Bird 1      | Infected bird          |
| 14        | Blood           | Bird 2      | Infected bird          |
| 15        | Blood           | Bird 3      | Infected bird          |

592 \*sample contain un-digestated bird blood

593 **Table 2. Number of Differentially Expressed Genes (DEG) in each case**

| Case          | All DEG | DEG upregulated | %Upregulated DEG |
|---------------|---------|-----------------|------------------|
| 30mpi vs Bird | 71      | 8               | 11.2             |
| 8dpi vs Bird  | 311     | 96              | 30.8             |
| 12dpi vs Bird | 605     | 202             | 33.3             |
| 22dpi vs Bird | 421     | 166             | 39.4             |

594

595 **Table 3. Number of Differentially Expressed Upregulated Genes (DEG) specific to each condition**

| Bird | BM | 8dpi | 12dpi | 22dpi | Condition Description               | No. of Genes |
|------|----|------|-------|-------|-------------------------------------|--------------|
| -    | +  | -    | -     | -     | DEG exclusive in 30mpi stage        | 4            |
| -    | -  | +    | -     | -     | DEG exclusive in 8dpi stage         | 22           |
| -    | -  | +    | +     | -     | DEG in 8dpi and 12dpi stages        | 16           |
| -    | -  | -    | +     | -     | DEG exclusive in 12dpi stage        | 63           |
| -    | -  | -    | +     | +     | DEG in 12dpi and 22dpi stages       | 65           |
| -    | -  | -    | -     | +     | DEG exclusive in 22dpi stage        | 41           |
| -    | +  | +    | +     | +     | DEG in all stages                   | 2            |
| -    | -  | +    | +     | +     | DEG in 8dpi, 12dpi and 22dpi stages | 55           |

596 The Differentially Expressed Genes are compared crosswise and the patterns having biological meaning are  
597 listed in the table above. Plus(+) signs indicate the genes that are significant in that stage.

598

### 599 **Supporting Information:**

600 **Figure S1:** Mean oocyst (blue) and sporozoite (red) counts at each dissection day for each of the three birds  
601 (A: Bird 1, B: Bird 2, C: Bird 3). Shadows represent standard error. Parasitaemias and gametocytaemias for  
602 each of the birds are as follows: Bird 1: 5.12% and 1%, Bird 2: 7.33% and 0.4%, and Bird 3: 4.48% and 0.3%,  
603 respectively.

604 **Figure S2:** MultiQC report from FastQC analysis before filtering low quality reads and trimming for adapters  
605 and low-quality positions. Every line represents one sample.

606 **Figure S3: Estimate of contamination from reference genomes in FastQ Screen.** MultiQC report from  
607 FastQ\_Screen analysis. Every bar represents one sequence file. The samples in each group are in the order  
608 from left to right as follows: six samples from the bird blood transcriptome stage(bird) (paired end sequence  
609 files), next six from the blood meal stage (30mpi) (paired end sequence files), next six from 8dpi (paired end  
610 sequence files), the next six from 12dpi (paired end sequence files), and the last six from 22dpi. The light blue  
611 bar indicates uniquely mapped reads to the specific genome, the dark blue bar indicates reads multi-mapping  
612 on the same genome, and the light and dark red bars indicate read mapping to multiple genomes uniquely and  
613 at multiple sites, respectively. In the first screen (Figure S3A), the samples were mapped against Zebra finch,  
614 Canary and the malaria vector (mosquito) reference genomes. All the reads that did not map uniquely to these  
615 reference genomes were then extracted and mapped against parasite genome (Figure S3B)

616 **Figure S4: Per-sequence GC content after trimming and filtering.** The average observed GC% was 37%  
617 which is considerably higher than the genomic GC% of the *Plasmodium relictum* (18%).

618 **Figure S5:** We speculate that higher GC content is due to higher duplicate levels in the samples as indicated  
619 by spearman's rank correlation coefficient between GC content and duplicate levels.

620 **Figure S6: Related to Figure 3.** MA plot showing log-transformed normalized expression values for all the  
621 genes and the shrunk-en log fold change in different cases. Each gene is represented by a dot. The genes with  
622 an adjusted p-value < 0.01 are shown in red.

623 **Figure S7: Related to Figure 5,** figure shows the actual GO terms significantly enriched (pvalue <0.01) for  
624 different biological processes, molecular functions and cellular components for each time point as compared  
625 to the bird baseline.

626 **Figure S8:** Figure shows the actual GO terms significantly enriched (pvalue <0.05) for different biological  
627 processes, molecular functions and cellular components for each time point as compared to the bird baseline.

628 **Table S1:** Quality statistics from FastQC before filtering for contamination

629 **Table S2:** Fastq\_screen report from first filter reporting number of reads mapping to different genomes

630 **Table S3:** Fastq\_screen report from the second filter reporting number of reads mapping to parasite genome

631 **Table S4:** Trimmomatic result after filtering for contamination reporting number of reads retained after quality  
632 and adapter trimming  
633 **Table S5:** Quality control statistics from FastQC after trimming for low quality and adapter contents  
634 **Table S6:** HISAT2 alignment statistics  
635 **Table S7:** Gene count csv file generated from transcript assembly and abundance calculation  
636 **Table S8:** Differentially expressed genes for 30mpi vs bird  
637 **Table S9:** Differentially expressed genes for 8dpi vs bird  
638 **Table S10:** Differentially expressed genes for 12dpi vs bird  
639 **Table S11:** Differentially expressed genes for 22dpi vs bird  
640 **Table S12:** Differentially expressed upregulated genes exclusive and common to different timepoints with  
641 description  
642 **Table S13:** GO terms enriched for upregulated genes for 30mpi for biological process, cellular components  
643 and molecular functions. Terms with pvalue <0.01 are considered significant and discussed further.  
644 **Table S14:** GO terms enriched for upregulated genes for 8dpi for biological process, cellular components and  
645 molecular functions. Terms with pvalue <0.01 are considered significant and discussed further.  
646 **Table S15:** GO terms enriched for upregulated genes for 12dpi for biological process, cellular components  
647 and molecular functions. Terms with pvalue <0.01 are considered significant and discussed further.  
648 **Table S16:** GO terms enriched for upregulated genes for 22dpi for biological process, cellular components  
649 and molecular functions. Terms with pvalue <0.01 are considered significant and discussed further.

650

## 651 **References**

652 Aguilar R, Dong Y, Warr E, Dimopoulos G. 2005. Anopheles infection responses; laboratory models versus  
653 field malaria transmission systems. *Acta Tropica* 95:285-291.  
654 Akinosoglou KA, Bushell ESC, Ukegbu CV, Schlegelmilch T, Cho J-S, Redmond S, Sala K, Christophides  
655 GK, Vlachou D. 2015. Characterization of Plasmodium developmental transcriptomes in Anopheles gambiae  
656 midgut reveals novel regulators of malaria transmission. *Cellular microbiology* 17:254-268.  
657 Aldrich C, Magini A, Emiliani C, Dottorini T, Bistoni F, Crisanti A, Spaccapelo R. 2012. Roles of the Amino  
658 Terminal Region and Repeat Region of the Plasmodium berghei Circumsporozoite Protein in Parasite  
659 Infectivity. *PLoS ONE* 7:e32524.  
660 Alexa A, Rahnenfuhrer J. 2019. *topGO*: Enrichment Analysis for Gene Ontology. R package version 2.38.1.  
661 Aly ASI, Lindner SE, MacKellar DC, Peng X, Kappe SHI. 2011. SAPI is a critical post-transcriptional  
662 regulator of infectivity in malaria parasite sporozoite stages. *Molecular microbiology* 79:929-939.  
663 Aly ASI, Vaughan AM, Kappe SHI. 2009. Malaria parasite development in the mosquito and infection of the  
664 mammalian host. *Annual review of microbiology* 63:195-221.  
665 Anders S, Huber W. 2010. Differential expression analysis for sequence count data. *Genome Biology* 11:R106.



- 666 Anders S, Pyl PT, Huber W. 2015. HTSeq--a Python framework to work with high-throughput sequencing  
667 data. *Bioinformatics* (Oxford, England) 31:166-169.
- 668 Andrews S, Krueger F, Segonds-Pichon A, Biggins L, Krueger C, Wingett S. FastQC: a quality control tool  
669 for high throughput sequence data. Available online at:  
670 <http://www.bioinformatics.babraham.ac.uk/projects/fastqc>
- 671 Arévalo-Pinzón G, Curtidor H, Muñoz M, Patarroyo MA, Patarroyo ME. 2011. Synthetic peptides from two  
672 Pf sporozoite invasion-associated proteins specifically interact with HeLa and HepG2 cells. *Peptides* 32:1902-  
673 1908.
- 674 Atkinson CT, LaPointe DA. 2009. Introduced Avian Diseases, Climate Change, and the Future of Hawaiian  
675 Honeycreepers. *Journal of Avian Medicine and Surgery* 23:53-63, 11.
- 676 Becker K, Tilley L, Vennerstrom JL, Roberts D, Rogerson S, Ginsburg H. 2004. Oxidative stress in malaria  
677 parasite-infected erythrocytes: host-parasite interactions. *International Journal for Parasitology* 34:163-189.
- 678 Bell AS, de Roode JC, Sim D, Read AF. 2006. Within-host competition in genetically diverse malaria  
679 infections: parasite virulence and competitive success. *Evolution* 60:1358-1371.
- 680 Bensch S, Hellgren O, Pérez-Tris J. (Bensch2009 co-authors). 2009. MalAvi: a public database of malaria  
681 parasites and related haemosporidians in avian hosts based on mitochondrial cytochrome b lineages. *Mol Ecol*  
682 *Resour.* 9.
- 683 Bensch S, Pérez-Tris J, Waldenström J, Hellgren O. 2004. LINKAGE BETWEEN NUCLEAR AND  
684 MITOCHONDRIAL DNA SEQUENCES IN AVIAN MALARIA PARASITES: MULTIPLE CASES OF  
685 CRYPTIC SPECIATION? *Evolution* 58:1617-1621.
- 686 Böhme U, Otto TD, Cotton JA, Steinbiss S, Sanders M, Oyola SO, Nicot A, Gandon S, Patra KP, Herd C, et  
687 al. 2018. Complete avian malaria parasite genomes reveal features associated with lineage-specific evolution  
688 in birds and mammals. *Genome research* 28:547-560.
- 689 Bolger AM, Lohse M, Usadel B. 2014. Trimmomatic: a flexible trimmer for Illumina sequence data.  
690 *Bioinformatics* (Oxford, England) 30:2114-2120.
- 691 Boudjelas S, Browne M, De Poorter M, Lowe S. 2000. 100 of the world's worst invasive alien species : a  
692 selection from the Global Invasive Species Database: The Invasive Species Specialist Group (ISSG) a  
693 specialist group of the Species Survival Commission (SSC) of the World Conservation Union (IUCN).
- 694 Bozdech Z, Llinás M, Pulliam BL, Wong ED, Zhu J, DeRisi JL. 2003. The Transcriptome of the  
695 Intraerythrocytic Developmental Cycle of *Plasmodium falciparum*. *PLOS Biology* 1:e5.
- 696 Chagas CRF, Valkiūnas G, de Oliveira Guimarães L, Monteiro EF, Guida FJV, Simões RF, Rodrigues PT, de  
697 Albuquerque Luna EJ, Kirchgatter K. (Chagas2017 co-authors). 2017. Diversity and distribution of avian  
698 malaria and related haemosporidian parasites in captive birds from a Brazilian megalopolis. *Malaria Journal*  
699 16:83.
- 700 Charleston M, Perkins S. 2003. *Tangled Trees: Phylogeny, Cospeciation, and Coevolution.*

- 701 Cohuet A, Osta MA, Morlais I, Awono-Ambene PH, Michel K, Simard F, Christophides GK, Fontenille D,  
702 Kafatos FC. 2006. Anopheles and Plasmodium: from laboratory models to natural systems in the field. *EMBO*  
703 *reports* 7:1285-1289.
- 704 Combe A, Moreira C, Ackerman S, Thiberge S, Templeton TJ, Ménard R. 2009. TREP, a novel protein  
705 necessary for gliding motility of the malaria sporozoite. *International Journal for Parasitology* 39:489-496.
- 706 Coppi A, Natarajan R, Pradel G, Bennett BL, James ER, Roggero MA, Corradin G, Persson C, Tewari R,  
707 Sinnis P. 2011. The malaria circumsporozoite protein has two functional domains, each with distinct roles as  
708 sporozoites journey from mosquito to mammalian host. *The Journal of experimental medicine* 208:341-356.
- 709 Doerig C, Billker O, Haystead T, Sharma P, Tobin AB, Waters NC. 2008. Protein kinases of malaria parasites:  
710 an update. *Trends in Parasitology* 24:570-577.
- 711 Douradinha B, Augustijn KD, Moore SG, Ramesar J, Mota MM, Waters AP, Janse CJ, Thompson J. 2011.  
712 Plasmodium Cysteine Repeat Modular Proteins 3 and 4 are essential for malaria parasite transmission from  
713 the mosquito to the host. *Malar J* 10:71.
- 714 Ewels P, Magnusson M, Lundin S, Källér M. 2016. MultiQC: summarize analysis results for multiple tools  
715 and samples in a single report. *Bioinformatics (Oxford, England)* 32:3047-3048.
- 716 Gerald N, Mahajan B, Kumar S. 2011. Mitosis in the human malaria parasite Plasmodium falciparum.  
717 *Eukaryotic cell* 10:474-482.
- 718 Hellgren O, Atkinson CT, Bensch S, Albayrak T, Dimitrov D, Ewen JG, Kim KS, Lima MR, Martin L,  
719 Palinauskas V, et al. 2015. Global phylogeography of the avian malaria pathogen Plasmodium relictum based  
720 on MSP1 allelic diversity. *Ecography* 38:842-850.
- 721 Iwanaga S, Kaneko I, Kato T, Yuda M. 2012. Identification of an AP2-family Protein That Is Critical for  
722 Malaria Liver Stage Development. *PLoS ONE* 7:e47557.
- 723 Jaramillo-Gutierrez G, Rodrigues J, Ndikuyeze G, Povelones M, Molina-Cruz A, Barillas-Mury C. 2009.  
724 Mosquito immune responses and compatibility between Plasmodium parasites and anopheline mosquitoes.  
725 *BMC Microbiology* 9:154.
- 726 Kariu T, Ishino T, Yano K, Chinzei Y, Yuda M. 2006. CelTOS, a novel malarial protein that mediates  
727 transmission to mosquito and vertebrate hosts. *Molecular microbiology* 59:1369-1379.
- 728 Kariu T, Yuda M, Yano K, Chinzei Y. 2002. MAEBL is essential for malarial sporozoite infection of the  
729 mosquito salivary gland. *The Journal of experimental medicine* 195:1317-1323.
- 730 Kim D, Langmead B, Salzberg SL. 2015. HISAT: a fast spliced aligner with low memory requirements. *Nature*  
731 *methods* 12:357-360.
- 732 Langmead B, Salzberg SL. 2012. Fast gapped-read alignment with Bowtie 2. *Nature methods* 9:357-359.
- 733 Levine ND. 1988. The protozoan phylum Apicomplexa. Volume I. Volume II.  
734 203 + 154 pp.: CRC Press, Inc. Boca Raton, FL 33431 USA.
- 735 Li H, Durbin R. 2009. Fast and accurate short read alignment with Burrows-Wheeler transform. *Bioinformatics*  
736 (Oxford, England) 25:1754-1760.

- 737 Lindner SE, Swearingen KE, Shears MJ, Walker MP, Vrana EN, Hart KJ, Minns AM, Sinnis P, Moritz RL,  
738 Kappe SHI. 2019. Transcriptomics and proteomics reveal two waves of translational repression during the  
739 maturation of malaria parasite sporozoites. *Nature Communications* 10:4964.
- 740 Love MI, Huber W, Anders S. 2014. Moderated estimation of fold change and dispersion for RNA-seq data  
741 with DESeq2. *Genome Biology* 15:550.
- 742 Martins RM, Macpherson CR, Claes A, Scheidig-Benatar C, Sakamoto H, Yam XY, Preiser P, Goel S,  
743 Wahlgren M, Sismeiro O, et al. 2017. An ApiAP2 member regulates expression of clonally variant genes of  
744 the human malaria parasite *Plasmodium falciparum*. *Scientific reports* 7:14042-14042.
- 745 Medeiros MCI, Hamer GL, Ricklefs RE. 2013. Host compatibility rather than vector-host-encounter rate  
746 determines the host range of avian *Plasmodium* parasites. *Proceedings. Biological sciences* 280:20122947-  
747 20122947.
- 748 Ménard R, Sultan AA, Cortes C, Altszuler R, van Dijk MR, Janse CJ, Waters AP, Nussenzweig RS,  
749 Nussenzweig V. 1997a. Circumsporozoite protein is required for development of malaria sporozoites in  
750 mosquitoes. *Nature* 385:336-340.
- 751 Ménard R, Sultan AA, Cortes C, Altszuler R, van Dijk MR, Janse CJ, Waters AP, Nussenzweig RS,  
752 Nussenzweig V. 1997b. Circumsporozoite protein is required for development of malaria sporozoites in  
753 mosquitoes. *Nature* 385:336-340.
- 754 Mikolajczak SA, Silva-Rivera H, Peng X, Tarun AS, Camargo N, Jacobs-Lorena V, Daly TM, Bergman LW,  
755 de la Vega P, Williams J, et al. 2008. Distinct malaria parasite sporozoites reveal transcriptional changes that  
756 cause differential tissue infection competence in the mosquito vector and mammalian host. *Molecular and  
757 cellular biology* 28:6196-6207.
- 758 Modrzynska K, Pfander C, Chappell L, Yu L, Suarez C, Dundas K, Gomes AR, Goulding D, Rayner JC,  
759 Choudhary J, et al. 2017. A Knockout Screen of ApiAP2 Genes Reveals Networks of Interacting  
760 Transcriptional Regulators Controlling the *Plasmodium* Life Cycle. *Cell host & microbe* 21:11-22.
- 761 Moreira CK, Templeton TJ, Lavazec C, Hayward RE, Hobbs CV, Kroeze H, Janse CJ, Waters AP, Sinnis P,  
762 Coppi A. 2008. The *Plasmodium* TRAP/MIC2 family member, TRAP-Like Protein (TLP), is involved in tissue  
763 traversal by sporozoites. *Cellular microbiology* 10:1505-1516.
- 764 Mota MM, Hafalla JCR, Rodriguez A. 2002. Migration through host cells activates *Plasmodium* sporozoites  
765 for infection. *Nature Medicine* 8:1318-1322.
- 766 Mota MM, Pradel G, Vanderberg JP, Hafalla JCR, Frevert U, Nussenzweig RS, Nussenzweig V, Rodríguez  
767 A. 2001. Migration of *Plasmodium* Sporozoites Through Cells Before Infection. *Science* 291:141.
- 768 Mu J, Joy DA, Duan J, Huang Y, Carlton J, Walker J, Barnwell J, Beerli P, Charleston MA, Pybus OG, et al.  
769 2005. Host Switch Leads to Emergence of *Plasmodium vivax* Malaria in Humans. *Molecular Biology and  
770 Evolution* 22:1686-1693.
- 771 Müller S. 2004. Redox and antioxidant systems of the malaria parasite *Plasmodium falciparum*. *Molecular  
772 microbiology* 53:1291-1305.

- 773 Ott KJ. 1967. *Malaria Parasites and Other Haemosporidia*. P. C. C. Garnham. Blackwell, Oxford, England;  
774 Davis, Philadelphia, 1966. 1132 pp., illus. \$35. In.
- 775 Otto TD, Wilinski D, Assefa S, Keane TM, Sarry LR, Böhme U, Lemieux J, Barrell B, Pain A, Berriman M,  
776 et al. 2010. New insights into the blood-stage transcriptome of *Plasmodium falciparum* using RNA-Seq.  
777 *Molecular microbiology* 76:12-24.
- 778 Palinauskas V, Valkiūnas G, Bolshakov CV, Bensch S. (Palinauskas2008 co-authors). 2008. *Plasmodium*  
779 *relictum* (lineage P-SGS1): effects on experimentally infected passerine birds. *Exp Parasitol* 120.
- 780 Palinauskas V, Valkiūnas G, Bolshakov CV, Bensch S. 2011. *Plasmodium relictum* (lineage SGS1) and  
781 *Plasmodium ashfordi* (lineage GRW2): The effects of the co-infection on experimentally infected passerine  
782 birds. *Experimental Parasitology* 127:527-533.
- 783 Patzewitz E-M, Guttery DS, Poulin B, Ramakrishnan C, Ferguson DJP, Wall RJ, Brady D, Holder AA, Szöör  
784 B, Tewari R. 2013. An ancient protein phosphatase, SHLP1, is critical to microneme development in  
785 *Plasmodium ookinetes* and parasite transmission. *Cell reports* 3:622-629.
- 786 Pigeault R, Vézilier J, Cornet S, Zélé F, Nicot A, Perret P, Gandon S, Rivero A. 2015. Avian malaria: a new  
787 lease of life for an old experimental model to study the evolutionary ecology of *Plasmodium*. *Philosophical*  
788 *transactions of the Royal Society of London. Series B, Biological sciences* 370:20140300.
- 789 Raj DK, Nixon CP, Nixon CE, Dvorin JD, DiPetrillo CG, Pond-Tor S, Wu H-W, Jolly G, Pischel L, Lu A, et  
790 al. 2014. Antibodies to PfSEA-1 block parasite egress from RBCs and protect against malaria infection.  
791 *Science* 344:871.
- 792 Schall JJ. 1996. Malarial parasites of lizards: diversity and ecology. *Adv Parasitol* 37:255-333.
- 793 Schall JJ. 2002. Parasite virulence. In: Lewis EE, Cambell JF, Sukhdeo MVK, editors. *The Behavioural*  
794 *Ecology of Parasites*: CABI Publishing. p. 283–313.
- 795 Siden-Kiamos I, Ecker A, Nybäck S, Louis C, Sinden RE, Billker O. 2006. *Plasmodium berghei* calcium-  
796 dependent protein kinase 3 is required for ookinete gliding motility and mosquito midgut invasion. *Molecular*  
797 *microbiology* 60:1355-1363.
- 798 Siden-Kiamos I, Pace T, Klonizakis A, Nardini M, Garcia CRS, Currà C. 2018. Identification of *Plasmodium*  
799 *berghei* Oocyst Rupture Protein 2 (ORP2) domains involved in sporozoite egress from the oocyst. *International*  
800 *Journal for Parasitology* 48:1127-1136.
- 801 Siegel TN, Hon C-C, Zhang Q, Lopez-Rubio J-J, Scheidig-Benatar C, Martins RM, Sismeiro O, Coppée J-Y,  
802 Scherf A. 2014. Strand-specific RNA-Seq reveals widespread and developmentally regulated transcription of  
803 natural antisense transcripts in *Plasmodium falciparum*. *BMC Genomics* 15:150.
- 804 Silvie O, Goetz K, Matuschewski K. 2008. A Sporozoite Asparagine-Rich Protein Controls Initiation of  
805 *Plasmodium* Liver Stage Development. *PLoS pathogens* 4:e1000086.
- 806 Sinden RE, Dawes EJ, Alavi Y, Waldock J, Finney O, Mendoza J, Butcher GA, Andrews L, Hill AV, Gilbert  
807 SC, et al. 2007. Progression of *Plasmodium berghei* through *Anopheles stephensi* Is Density-Dependent. *PLoS*  
808 *pathogens* 3:e195.

- 809 Spencer KA, Buchanan KL, Leitner S, Goldsmith AR, Catchpole CK. 2005. Parasites affect song complexity  
810 and neural development in a songbird. *Proceedings. Biological sciences* 272:2037-2043.
- 811 Srinivasan P, Fujioka H, Jacobs-Lorena M. 2008. PbCap380, a novel oocyst capsule protein, is essential for  
812 malaria parasite survival in the mosquito. *Cellular microbiology* 10:1304-1312.
- 813 Srivastava A, Philip N, Hughes KR, Georgiou K, MacRae JI, Barrett MP, Creek DJ, McConville MJ, Waters  
814 AP. 2016. Stage-Specific Changes in Plasmodium Metabolism Required for Differentiation and Adaptation to  
815 Different Host and Vector Environments. *PLoS pathogens* 12:e1006094-e1006094.
- 816 Steinbuechel M, Matuschewski K. 2009. Role for the Plasmodium sporozoite-specific transmembrane protein  
817 S6 in parasite motility and efficient malaria transmission. *Cellular microbiology* 11:279-288.
- 818 Sultan AA, Thathy V, Frevert U, Robson KJH, Crisanti A, Nussenzweig V, Nussenzweig RS, Ménard R. 1997.  
819 TRAP Is Necessary for Gliding Motility and Infectivity of Plasmodium Sporozoites. *Cell* 90:511-522.
- 820 Sylvia M. Fallon, Eldredge Bermingham, Robert E. Ricklefs. 2005. Host Specialization and Geographic  
821 Localization of Avian Malaria Parasites: A Regional Analysis in the Lesser Antilles. *The American Naturalist*  
822 165:466-480.
- 823 Thompson J, Fernandez-Reyes D, Sharling L, Moore SG, Eling WM, Kyes SA, Newbold CI, Kafatos FC,  
824 Janse CJ, Waters AP. 2007. Plasmodium cysteine repeat modular proteins 1–4: complex proteins with roles  
825 throughout the malaria parasite life cycle. *Cellular microbiology* 9:1466-1480.
- 826 Valkiūnas G. 2005. Avian malaria parasites and other Haemosporidia. Boca Raton: CRC.
- 827 van Riper C, van Riper SG, Goff ML, Laird M. 1986. The Epizootiology and Ecological Significance of  
828 Malaria in Hawaiian Land Birds. *Ecological Monographs* 56:327-344.
- 829 Vanstreels RET, da Silva-Filho RP, Kolesnikovas CKM, Bhering RCC, Ruoppolo V, Epiphanyo S, Amaku M,  
830 Ferreira Junior FC, Braga ÉM, Catão-Dias JL. 2015. Epidemiology and pathology of avian malaria in penguins  
831 undergoing rehabilitation in Brazil. *Veterinary research* 46:30-30.
- 832 Vaughan JA. 2007. Population dynamics of *Plasmodium* sporogony. *Trends in Parasitology* 23:63-70.
- 833 Vézilier J, Nicot A, Gandon S, Rivero A. 2010. Insecticide resistance and malaria transmission: infection rate  
834 and oocyst burden in *Culex pipiens* mosquitoes infected with *Plasmodium relictum*. *Malaria Journal* 9:379.
- 835 Videvall E, Cornwallis CK, Ahrén D, Palinauskas V, Valkiūnas G, Hellgren O. 2017. The transcriptome of  
836 the avian malaria parasite *Plasmodium ashfordi* displays host-specific gene expression. *Molecular Ecology*  
837 26:2939-2958.
- 838 Videvall E, Cornwallis CK, Palinauskas V, Valkiūnas G, Hellgren O. 2015. The avian transcriptome response  
839 to malaria infection. *Molecular Biology and Evolution* 32:1255-1267.
- 840 Wang Q, Fujioka H, Nussenzweig V. 2005. Mutational analysis of the GPI-anchor addition sequence from the  
841 circumsporozoite protein of *Plasmodium*. *Cellular microbiology* 7:1616-1626.
- 842 Warburg A, Touray M, Krettli AU, Miller LH. 1992. *Plasmodium gallinaceum*: Antibodies to  
843 circumsporozoite protein prevent sporozoites from invading the salivary glands of *Aedes aegypti*.  
844 *Experimental Parasitology* 75:303-307.

845 Warner RE. 1968. The Role of Introduced Diseases in the Extinction of the Endemic Hawaiian Avifauna. The  
846 Condor 70:101-120.

847 Wengelnik K, Spaccapelo R, Naitza S, Robson KJ, Janse CJ, Bistoni F, Waters AP, Crisanti A. 1999. The A-  
848 domain and the thrombospondin-related motif of Plasmodium falciparum TRAP are implicated in the invasion  
849 process of mosquito salivary glands. The EMBO journal 18:5195-5204.

850 Wingett SW, Andrews S. 2018. FastQ Screen: A tool for multi-genome mapping and quality control.  
851 F1000Research 7:1338-1338.

852 Xu X, Dong Y, Abraham EG, Kocan A, Srinivasan P, Ghosh AK, Sinden RE, Ribeiro JMC, Jacobs-Lorena  
853 M, Kafatos FC, et al. 2005. Transcriptome analysis of Anopheles stephensi–Plasmodium berghei interactions.  
854 Molecular and Biochemical Parasitology 142:76-87.

855 Yadav MK, Swati D. 2012. Comparative genome analysis of six malarial parasites using codon usage bias  
856 based tools. Bioinformatics 8:1230-1239.

857 Yuda M, Iwanaga S, Shigenobu S, Kato T, Kaneko I. 2010. Transcription factor AP2-Sp and its target genes  
858 in malarial sporozoites. Molecular microbiology 75:854-863.

859 Yuda M, Iwanaga S, Shigenobu S, Mair GR, Janse CJ, Waters AP, Kato T, Kaneko I. 2009. Identification of  
860 a transcription factor in the mosquito-invasive stage of malaria parasites. Molecular microbiology 71:1402-  
861 1414.

862 Zélé F, Nicot A, Berthomieu A, Weill M, Duron O, Rivero A. 2014. Wolbachia increases susceptibility to  
863 Plasmodium infection in a natural system. Proceedings. Biological sciences 281:20132837-20132837.

864 Zheng W, Liu F, He Y, Liu Q, Humphreys GB, Tsuboi T, Fan Q, Luo E, Cao Y, Cui L. 2017. Functional  
865 characterization of Plasmodium berghei PSOP25 during ookinete development and as a malaria transmission-  
866 blocking vaccine candidate. Parasites & vectors 10:8-8.

867

868

869

870

871

872

873

874

875

876

877

878

879

880



Figure 1: Temporal dynamics of Plasmodium development in mosquitoes

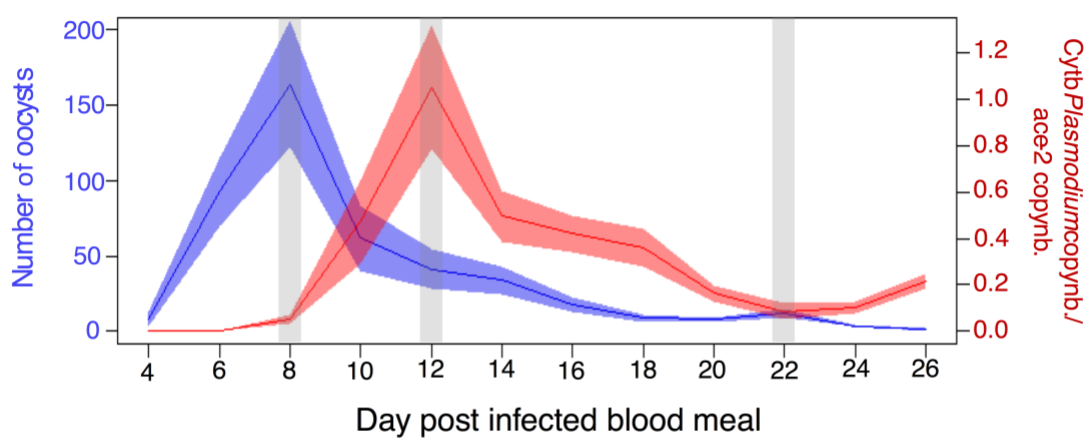

Figure 2A: PCA plot with variable stabilizing transformation. 2B: Heatmap portraying Euclidian distance measured between the different samples.

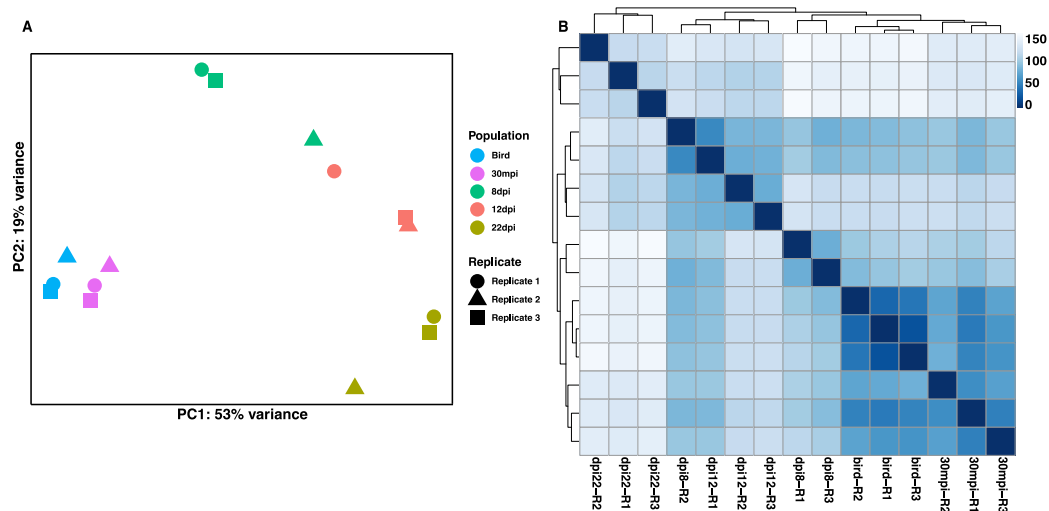

Figure 3: Volcano plots showing log<sub>2</sub> fold change in expression on the x-axis and P-adjusted values on the y-axis for each of the 4 time points.

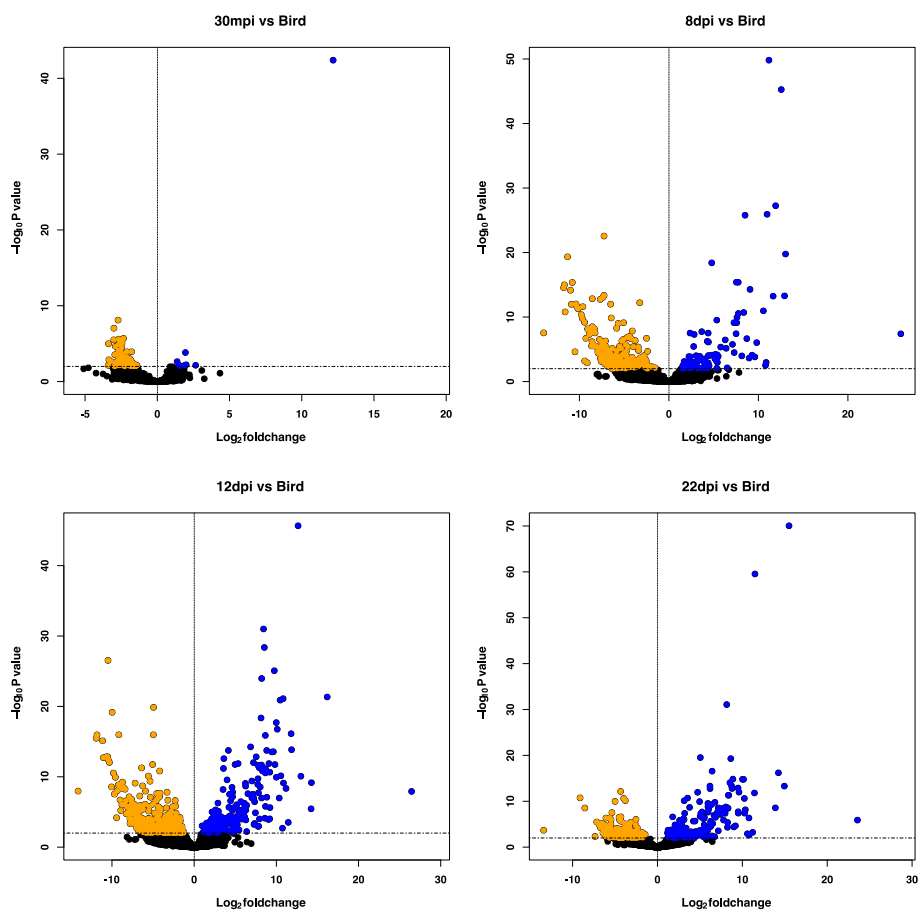

Figure 4: Venn diagram representing a crosswise comparison of upregulated genes in each of the 4 time points.

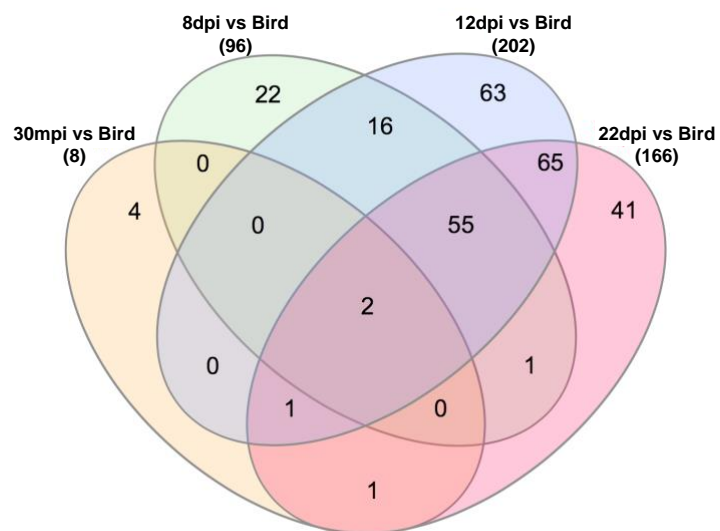

Figure 5: Gene ontology enrichment analysis for upregulated DEGs.

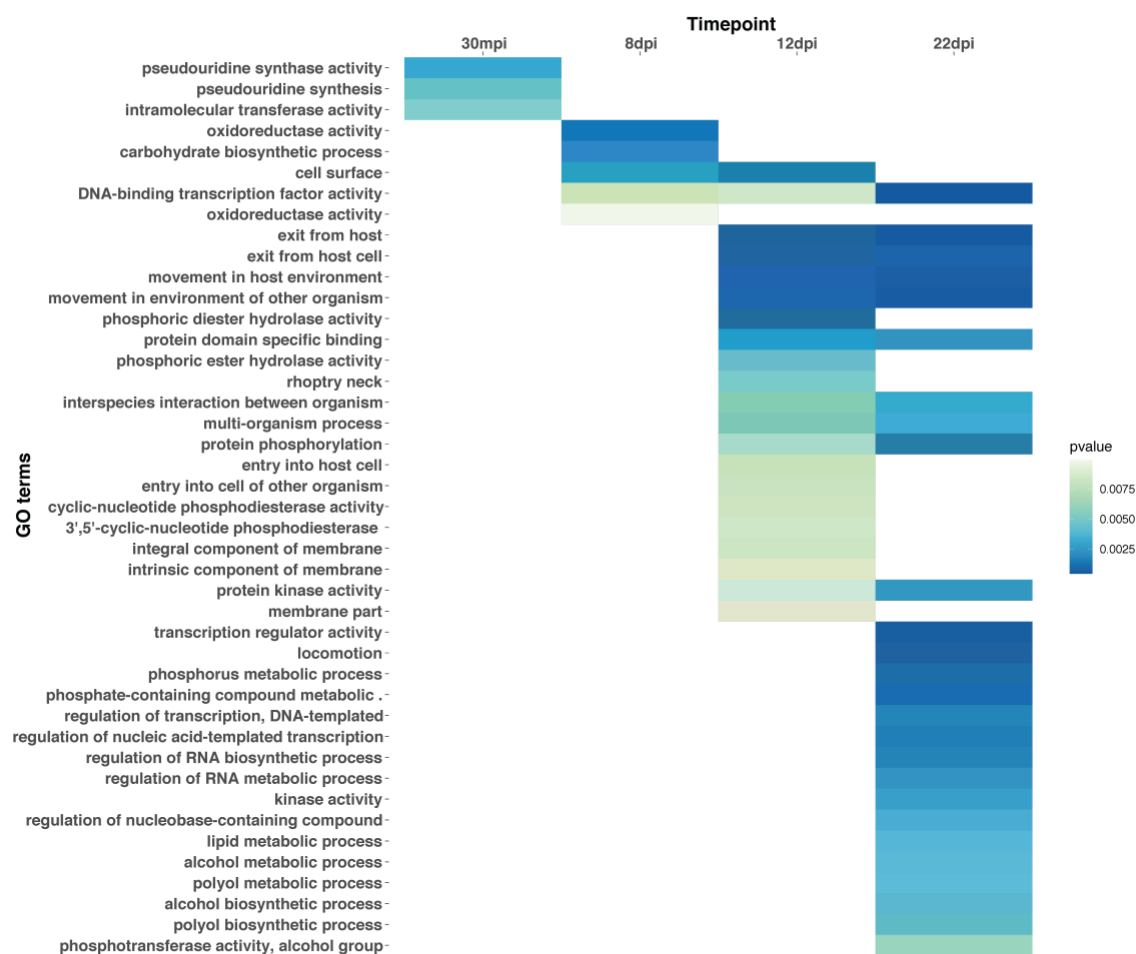

Source: https://www.biorxiv.org/content/10.1101/2020.07.16.204198v1.full.pdf
